# Supplementary material
Source: publisher figshare collection journal article supplement (https://frontiersin.figshare.com/ndownloader/files/28399080)
Supplement: Supplementary file 1 [file 28399080]

"Romania's sold Roma children"

A criminal gang from Țândărei trafficked thousands of Roma children in the West, forcing them to beg and steal.

DIICOT did not bring any direct evidence "- explanation of the acquittal of the defendants in the Țândărei Case

The 25 defendants in the Țândărei case, accused by DIICOT prosecutors of child trafficking and money laundering, were finally acquitted, at the end of 2019, by the judges of the Târgu Mureș Court of Appeal, because the investigators did not bring any evidence to prove the charges brought.

False kidnapping call to Țândărei. A minor set the police on fire

As a result of the notification, a complex team was set up, coordinated by the Inspectorate's management, consisting of specialists from the Criminal Investigation Service, the Țândărei City Police and the Ialomița Information Analysis Office. Police officers immediately started activities specific to the search for people, after receiving the emergency call, following the verifications carried out, a 13-year-old minor from the city of Țândărei was identified, on whom the mobile phone from which the call was made was found. Following the discussions with the minor, it emerged that she, in the spirit of a joke, would have called the emergency service to falsely report that she had been abducted. At the building where the minor was identified was also her father, a 48-year-old man, who was sanctioned for non-supervision of minors.

The nurse from Țândărei, confirmed with COVID-19, died

The local authorities in Țândărei demand mass testing of the population

The Local Committee for Emergency Situations from Țândărei requested the Public Health Directorate from Ialomița to carry out a mass testing campaign of the local citizens. The latest data show that in the city of Țândărei there is a decrease in the number of cases of COVID-19 infections.

Basescu, racist comments: "Gypsy groups must understand that they cannot be tolerated with their way of life." Former president, reported

The bomb that is about to explode at Țândărei. The County Committee for Emergency Situations proposes the quarantine of the city with 4 deaths due to COVID-19

The situation is really explosive in the city of Țândărei due to the growing number of Ialomița residents who returned from abroad and who do not exactly follow the rules at home. Known as a locality with a majority Roma population, the authorities face difficulties in managing the situation.

Total quarantine in Țândărei, the "capital" of child traffickers

The town of Țândărei in Ialomița County, which became known for the Roma clans that developed international human trafficking networks, was put in total quarantine by the authorities after it became an outbreak of infection, given that hundreds of locals returned to the country did not comply with the isolation measures.

What are the routes for bypassing the city of Țândărei closed by Military Ordinance?

The case of child trafficking: No direct evidence was provided for the 25 defendants

Investigative teams have been unable to prove that networks in Țândărei's case exploited Roma children in Western Europe, say judges who ended the scandalous case with 25 acquittals.

CFR Călători will not issue travel tickets for Țândărei, after the city has entered full quarantine

CNCD filed a complaint after the political scientist Vladimir Tismăneanu shared a racist post on Facebook

The National Council for Combating Discrimination (CNCD) is suing after political scientist Vladimir Tismăneanu posted a racist post on Facebook, CNCD President Asztalos Csaba announced, stating that the position of the University of Maryland in the United States will be requested, where Tismăneanu is a teacher.

How Europe infected the Strachina neighborhood from Bărbănt

The return from the West of several hundred locals from Țândărei led to the establishment of a generalized quarantine in the city, with military patrols on the streets.

How the locals from Țândărei received the news that the quarantine was lifted. The message sent by the mayor

Boundless joy at Țândărei, the city in the heart of Bărbănt placed in quarantine on April 4. The Minister of Interior, Marcel Vela, announced on Monday evening that the Military Ordinance 11 has been issued. Thus, the city of Țândărei comes out of quarantine. Nicoleta Toma, the mayor of the locality, declared for Adevărul that this news brought an enormous joy.

How gold was extracted in ancient times from the Jiu and Olt rivers. Jewelry later made by enslaved gypsies

How the inhabitants of Țândărei defy quarantine. Two young men were caught sneaking up with their girlfriends

Dan Negru: "You have isolated some for whom you have never done anything. The Romanian state closed its eyes when dozens of children from Țândărei were trafficked to Europe "

The Roma leader from Constanța: "We must respect the laws, even if it is difficult for us to change our behavior when it comes to our customs"

The inhabitants of Țândărei have the right to leave the locality. Who is allowed to leave the quarantined city?

Ludovic Orban: Many people from countries included in the red zone came to Ialomița. What the authorities are preparing?

Street fights in Romania's ghettos against the restrictions generated by the fight against the new coronavirus. "I'm sorry to the cops"

In the context of the restrictions imposed by the authorities, this Easter there were real street fights between gypsy clans from the notorious neighborhoods of the Capital, but also from Hunedoara, Ploiești and Săcele, followed by a timid intervention of the police, apparently scared to take an attitude to master the phenomenon.

The message received by the Roma activist Ciprian Necula after Băsescu's racist comment: "It's a pity he didn't live Antonescu to eradicate gypsyism "

The suspicious death of a man from Țândărei, investigated by the Ialomița Public Health Directorate. It is not known if he was infected with coronavirus

Seasonal workers, gypsies and common sense Romania

A nurse from Țândărei killed by Covid-19. The woman was 42 years old

A new military ordinance. Measures announced by the Ministry of Interior: quarantine in Țândărei, several suspended flights VIDEO

The fascinating story of the Romanian woman adopted and raised by gypsies. She married at the age of 17, has a child and is called "Queen"

The prefect of Ialomița demands the dismissal of the heads of the Police and the Gendarmerie.

What reproaches are brought to them in the case of Bărbulești and Tandarei?

The first 9 Ialomiites cured by COVID-19 were discharged from the support hospital in Fetești

Raid with increased forces in Ialomita. The police legitimized 250 people and applied 33 sanctions

Ialomita police increased its numbers, two days ago, for the safety of the community and the enforcement of military ordinances, in Slobozia and in the city of Țândărei. 33 contravention sanctions amounting to over 67,000 lei were applied.

Raid with increased forces at Țândărei and Fetești. There were over 400 people legitimated

România TV, fined by CNA for racism: "The term 'gypsy' is very harsh, but it is assumed by all of us"

Detour routes after quarantine was introduced in the city of Țândărei. CFR Călători does not issue tickets anymore

The Țândărei Ambulance was closed. Four medical staff confirmed with the new coronavirus

Hundreds of police officers raided the town of Țândărei. 76 fines were imposed for non-compliance with quarantine

A 10-year-old minor was caught driving by police in Țândărei

A new death was confirmed in Țândărei's outbreak. The patient was 60 years old

VIDEO Bogdan Despescu, Secretary of State: MIA paid special attention in the Țândărei and Suceava areas.

**We sent law enforcement from Bucharest to these places.**

VIDEO What the locals from Țândărei say about the coronavirus: The disease has come upon us, the city should be closed. Maybe that's how they calm down

VIDEO How a man told the police to make the groceries for him because he is "starving"

VIDEO Military Ordinance 7 establishes a total quarantine at Țândărei. Minister of Interior: 60% of the cases of COVID-19 in Ialomita are from this city

VIDEO Big celebrations on the Easter night, at the cemetery and in the village. "This is what happens in Vizurești. What coronavirus?" How did the Roma react when the police came?

VIDEO The Romanian police send heavy artillery to make order in the county of Ialomița.  
**Despesu: It is a pity that some people have blatantly violated the rules**

VIDEO The Roma from Dolj relapses with a prayer in the bell tower: "Let all Romanians die and their wives be given to the gypsies"

VIDEO Țândărei, a deserted city. We show the city where the Police and the Army enforce the law

Vladimir Tismaneanu apologizes to the Roma, after a post with racist implications
